# Supplementary material
Source: Springer Nature journal article supplement (https://www.springermedizin.de/resource/supplementary/12943_2010_747_MOESM9_ESM.pdf/9554728)
Supplement: MOESM9 [file 9554728]

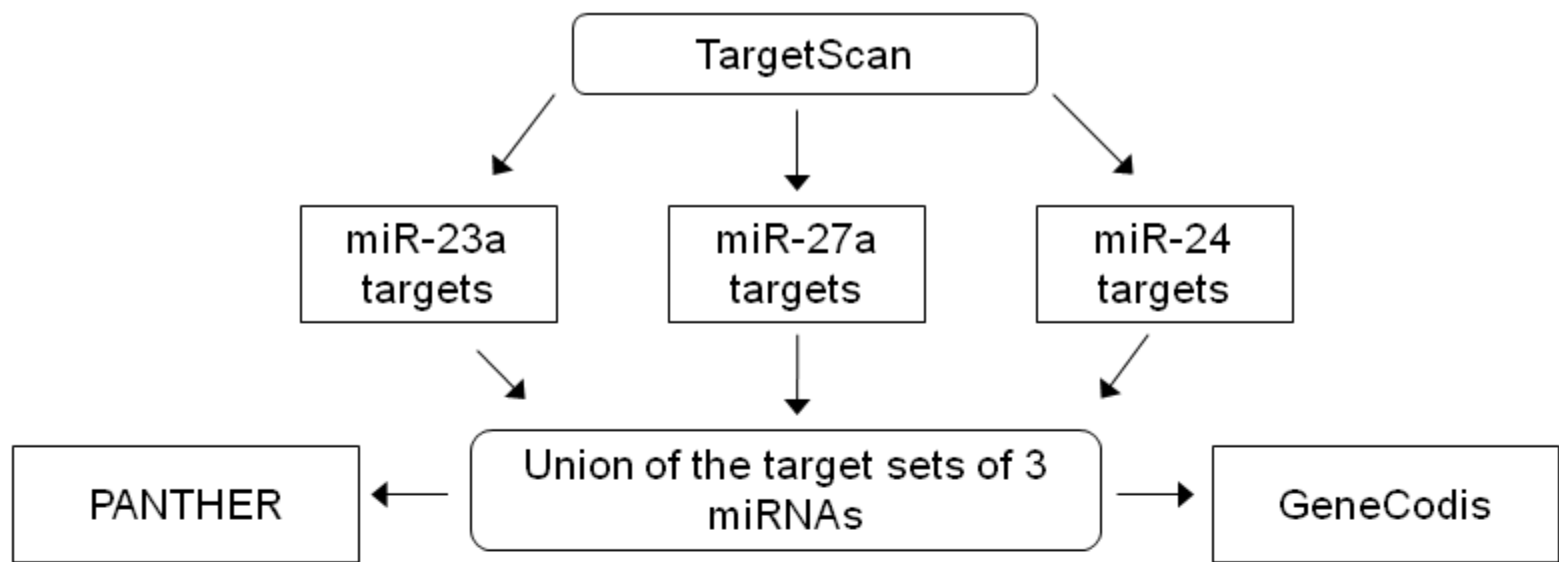

### PANTHER analysis

**Wnt signaling pathway**  
 EGF receptor signaling pathway  
 Angiogenesis  
 PDGF signaling pathway  
 Cadherin signaling pathway  
 PI3 kinase pathway  
 FGF signaling pathway  
 Integrin signalling pathway  
 Inflammation mediated by chemokine and cytokine signaling pathway  
 Heterotrimeric G-protein signaling pathway-Gi alpha and Gs alpha mediated pathway  
**TGF-beta signaling pathway**  
 Ras Pathway  
 Metabotropic glutamate receptor group III pathway  
**T cell activation**  
 Insulin/IGF pathway-protein kinase B signaling cascade  
**Insulin/IGF pathway-mitogen activated protein kinase kinase/MAP kinase cascade**  
 5HT2 type receptor mediated signaling pathway  
 Heterotrimeric G-protein signaling pathway-Gq alpha and Go alpha mediated pathway  
 Ionotropic glutamate receptor pathway  
 Thyrotropin-releasing hormone receptor signaling pathway  
 Ubiquitin proteasome pathway  
 Interleukin signaling pathway  
 Apoptosis signaling pathway  
 Histamine H1 receptor mediated signaling pathway  
 Muscarinic acetylcholine receptor 1 and 3 signaling pathway  
**Cytoskeletal regulation by Rho GTPase**  
 Endothelin signaling pathway  
 Alzheimer disease-amyloid secretase pathway  
 Alpha adrenergic receptor signaling pathway  
 B cell activation

### GeneCodis analysis

Pathways in cancer  
**MAPK signaling pathway**  
 Focal adhesion  
 Axon guidance  
 Adherens junction  
**Regulation of actin cytoskeleton**  
 Tight junction  
 Neurotrophin signaling pathway  
**Wnt signaling pathway**  
 Renal cell carcinoma  
 ErbB signaling pathway  
 Endocytosis  
**T cell receptor signaling pathway**  
 Chronic myeloid leukemia  
 Colorectal cancer  
 Acute myeloid leukemia  
 Glioma  
 Fc gamma R-mediated phagocytosis  
 Prostate cancer  
 GnRH signaling pathway  
 Aldosterone-regulated sodium reabsorption  
 Pancreatic cancer  
**Insulin signaling pathway**  
 Ubiquitin mediated proteolysis  
 Melanogenesis  
 Long-term potentiation  
 Glycosphingolipid biosynthesis - lacto and neolacto series  
 Chemokine signaling pathway  
**TGF-beta signaling pathway**  
 Non-small cell lung cancer
